# Supplementary material for: The effect of small solar powered ‘Bͻkͻͻ’ net fans on mosquito net use: results from a randomized controlled cross-over trial in southern Ghana
Source: Springer Nature journal article supplement (doi:10.1186/s12936-016-1654-2), 2017-01-03
Supplement: MOESM2 [file 11977612]

## Additional file 2 Additional table and figures

**Table S1A: Results from pair-wise comparisons (F-tests) of net use between groups at screening, mid-point and end-point surveys, with p-values presented.**

|          | Survey    |         |        |
|----------|-----------|---------|--------|
|          | screening | mid     | end    |
| ITT      |           |         |        |
| G1 vs G2 | 0.2612    | 0.2917  | 0.9458 |
| G1 vs G3 | 0.7456    | 0.1375  | 0.0855 |
| G2 vs G3 | 0.1358    | 0.3638  | 0.1097 |
| PP       |           |         |        |
| G1 vs G2 | 0.3502    | NA (NS) | 0.7884 |
| G1 vs G3 | 0.2166    | 0.0052  | 0.0003 |
| G2 vs G3 | 0.0318    | 0.0036  | 0.0146 |

G1: Group 1; G2: Group 2; G3: Group 3; NA: Not available; NS: Not significant; vs: versus; p-values <0.05 are highlighted in green.

**Table S1B: Results from pair-wise comparisons (F-tests) of net use between surveys in Group 1, Group 2 and Group 3, with p-values presented.**

|        | Group  |        |        |
|--------|--------|--------|--------|
|        | 1      | 2      | 3      |
| ITT    |        |        |        |
| S vs M | 0.0002 | 0.0002 | 0      |
| S vs E | 0.0001 | 0.0383 | 0.0036 |
| M vs E | 0.1438 | 0.1735 | 0.2768 |
| PP     |        |        |        |
| S vs M | 0.0001 | 0.0009 | 0      |
| S vs E | 0      | 0.014  | 0.0028 |
| M vs E | 0.0523 | 0.2041 | 0.2136 |

S: screening survey; M: mid-point survey; E: end survey; vs: versus; p-values <0.05 are highlighted in green.

**Table S2: Mosquito net use conditional on having access to a net the night before the survey in households at screening, midline, and endline data collection points, by group.**

| Analysis   | Group1 |    |      |           | Group2 |    |      |           | Group3 |     |      |           |
|------------|--------|----|------|-----------|--------|----|------|-----------|--------|-----|------|-----------|
|            | N      | n  | %    | 95%CI     | N      | n  | %    | 95%CI     | N      | n   | %    | 95%CI     |
| <b>ITT</b> |        |    |      |           |        |    |      |           |        |     |      |           |
| Screen**   | 16     | 51 | 90.2 | 71.7–97.1 | 21     | 80 | 92.5 | 78.4–97.7 | 16     | 53  | 90.6 | 76.7–96.5 |
| Mid**      | 25     | 87 | 95.4 | 74.1–99.3 | 28     | 85 | 100  |           | 24     | 121 | 83.5 | 70.9–91.3 |
| End**      | 24     | 77 | 96.1 | 88.1–98.8 | 28     | 98 | 89.8 | 65.9–97.6 | 19     | 75  | 89.3 | 73.4–96.2 |
| <b>PP</b>  |        |    |      |           |        |    |      |           |        |     |      |           |
| Screen**   | 16     | 51 | 90.2 | 71.7–97.1 | 19     | 77 | 92.2 | 77.6–97.6 | 13     | 38  | 86.8 | 69.8–95.0 |
| Mid**      | 24     | 75 | 100  |           | 27     | 83 | 100  |           | 20     | 105 | 81.9 | 68.0–90.6 |
| End**      | 24     | 77 | 96.1 | 88.1–98.8 | 27     | 92 | 93.5 | 74.9–98.6 | 16     | 62  | 87.1 | 68.8–95.4 |

\*\* P < 0.01; Standard errors adjusted for intra-class correlation at the household level; N = number of households; n = number of individuals; CI = confidence interval; ITT = intention to treat; PP = per protocol.

**Table S3: Logistic regressions with person-level random effects predicting effect of intervention on mosquito net use conditional on access in study communities, using data from all groups and (fortnightly) surveys.**

|                               | Intention to treat analysis<br>(n=435) |               | Per protocol analysis<br>(n=394) |                |
|-------------------------------|----------------------------------------|---------------|----------------------------------|----------------|
|                               | OR                                     | 95% CI        | OR                               | 95% CI         |
| <b>Intervention</b>           |                                        |               |                                  |                |
| Bokoo net fans                | 1.08                                   | 0.58–2.01     | 2.41*                            | 1.16–5.35      |
| No fans (reference)           | 1                                      |               | 1                                |                |
| <b>Intensity of follow up</b> |                                        |               |                                  |                |
| Strong                        | 10.91**                                | 4.4–27.6      | 16.28**                          | 6.35–44.31     |
| Weak (reference)              | 1                                      |               | 1                                |                |
| <b>Constant</b>               | 1302.97**                              | 346.3–5349.61 | 787.69**                         | 187.59–3458.56 |

\* P < 0.05; \*\* P < 0.01; OR: odds ratio; CI: confidence interval

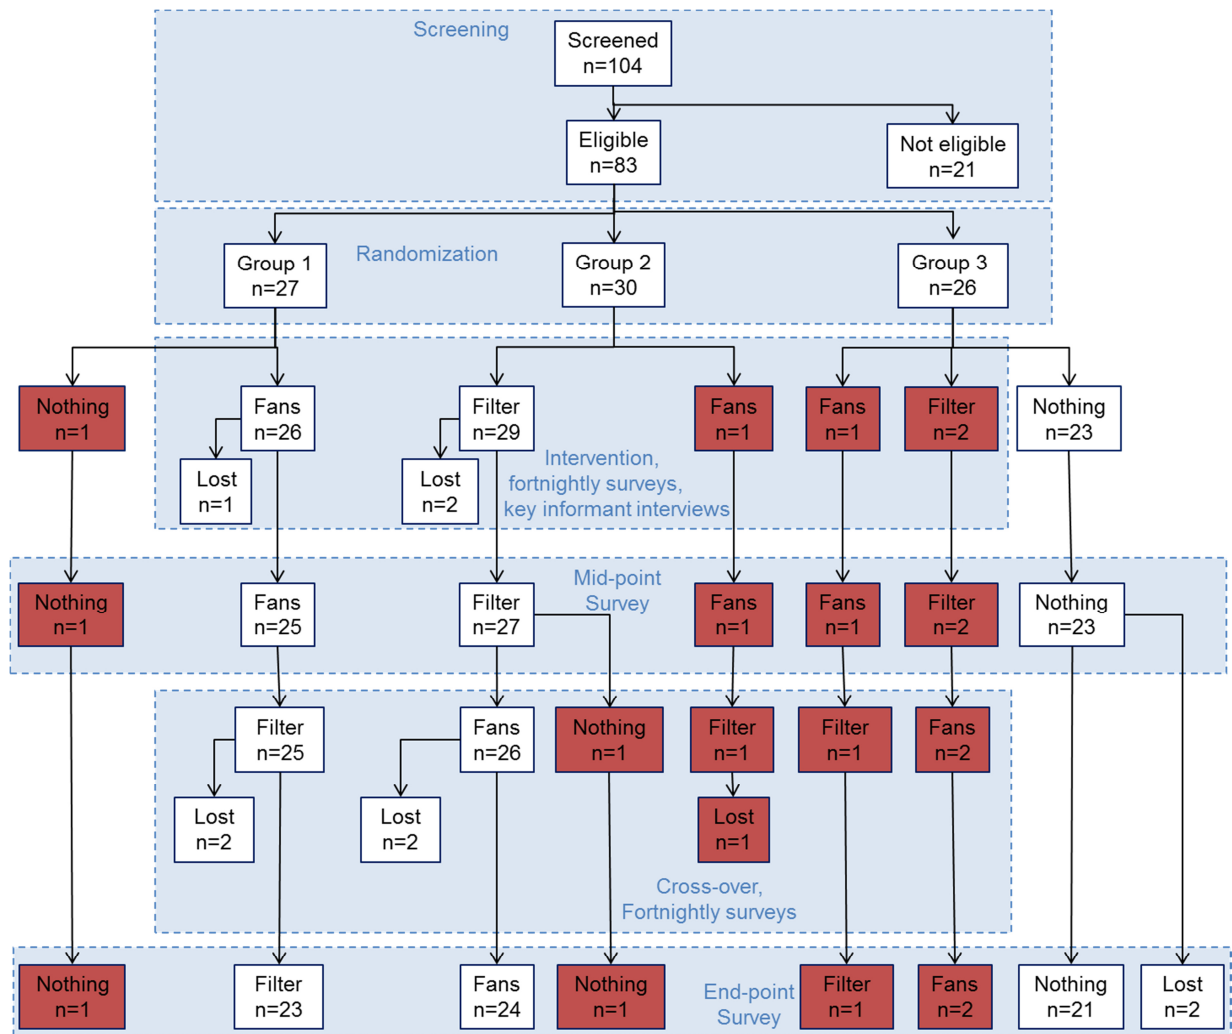

**Figure S1: Study profile with intervention details.** Data from households in red boxes were dropped from per-protocol analysis. Households that received neither fans nor filters are marked as 'Nothing'.

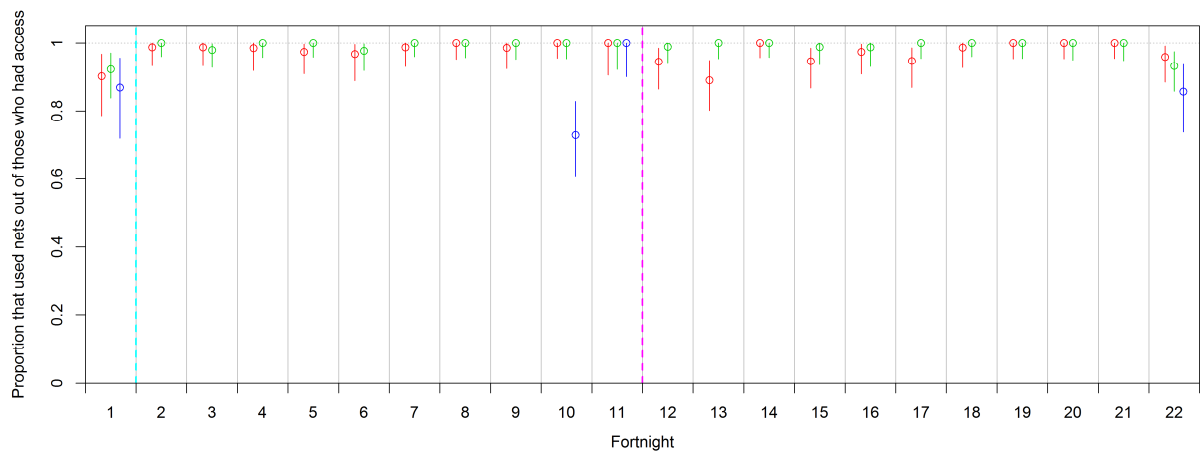

**Figure S2 Fortnightly net use conditional on access.** This figure shows the proportion of people that used bed nets out of those that had access in per protocol analysis per fortnight, with Group 1 in red, Group 2 in green, and Group 3 in blue. Vertical lines show 95% Clopper-Pearson exact confidence intervals. The cyan vertical dashed line demarcates the start of the intervention, and the magenta dashed line demarcates the cross-over of interventions between Group 1 and Group 2.

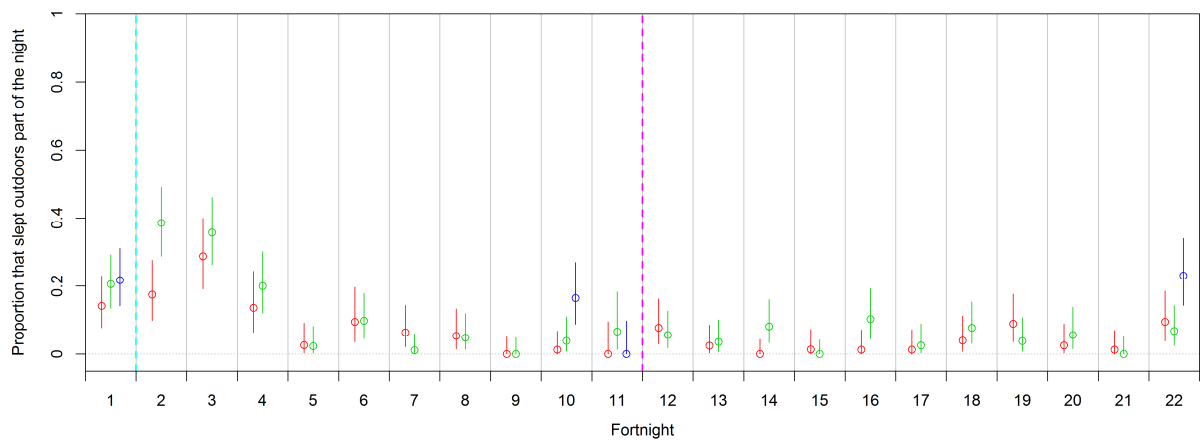

**Figure S3 Fortnightly outdoor sleeping behaviour.** This figure shows the proportion of people that slept outdoors at least part of the night in per protocol analysis per fortnight, with Group 1 in red, Group 2 in green, and Group 3 in blue. Vertical lines show 95% Clopper-Pearson exact confidence intervals. The cyan vertical dashed line demarcates the start of the intervention, and the magenta dashed line demarcates the cross-over of interventions between Group 1 and Group 2.

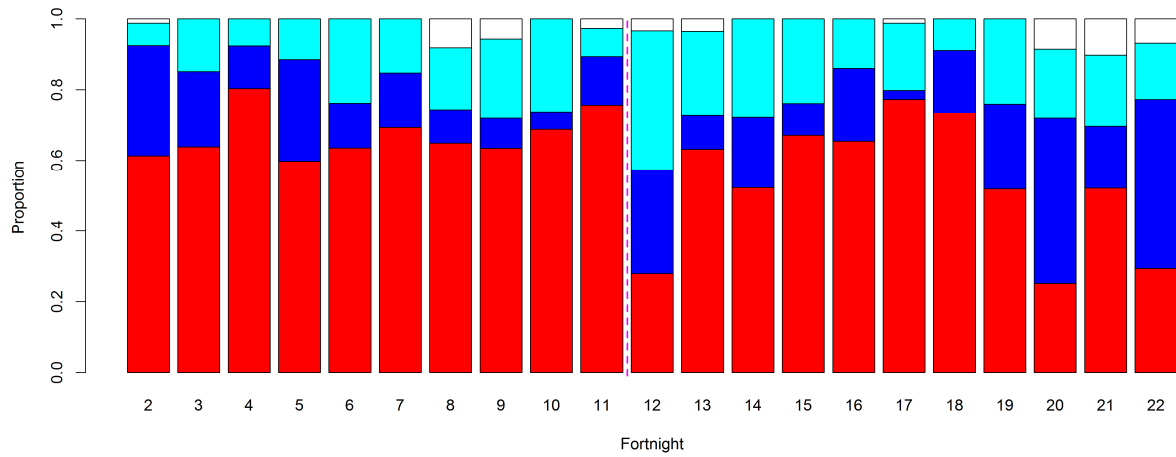

**Figure S4 Fortnightly fan use.** This figure shows the proportion of people that used the fan out of those that had access to a fan, and specifies the fan setting: high (red), mixed (dark blue), low (cyan), and not used (white). The magenta dashed line demarcates the cross-over of interventions between Group 1 and Group 2.
